# Supplementary material for: Assessing a Prototype Database for Comprehensive Global Aquatic Land Cover Mapping
Source: MDPI journal article supplement (doi:10.3390/rs13194012), 2021-10-07
Supplement: s1 [file s1]

## Supplementary Materials for Manuscript: Assessing a Prototype Database for Comprehensive Global Aquatic Land Cover Mapping

**Table S1.** GDAL commands used in the map generation.

| GDAL commands  | Application                                                         |
|----------------|---------------------------------------------------------------------|
| gdalwarp       | Image reprojection and resampling.                                  |
| gdalbuildvrt   | Integrating the input datasets by building a VRT (Virtual Dataset). |
| gdal_translate | Converting the VRT into the raster format.                          |
| gdal_calc.py   | Image reclassification; image masking.                              |

**Table S2.** Count-based confusion matrix for the integrated Level-1 map.

| Level-1                 | Reference   |             | Total | User's accuracy (%) |
|-------------------------|-------------|-------------|-------|---------------------|
|                         | Aquatic     | Non-Aquatic |       |                     |
| Map                     | Aquatic     | 1855        | 4493  | 58.7                |
|                         | Non-Aquatic | 21870       | 22221 | 98.4                |
|                         | Total       | 23725       | 26714 |                     |
| Producer's accuracy (%) | 88.3        | 92.2        |       | 91.7                |

**Table S3.** Count-based confusion matrix for the Level-2 persistence of water map.

| Persistence of water    | Reference           |                     |             | Total | User's accuracy (%) |
|-------------------------|---------------------|---------------------|-------------|-------|---------------------|
|                         | Permanently flooded | Temporarily flooded | Waterlogged |       |                     |
| Map                     | Permanently flooded | 47                  | 34          | 223   | 63.7                |
|                         | Temporarily flooded | 123                 | 49          | 299   | 41.1                |
|                         | Waterlogged         | 38                  | 19          | 76    | 25.0                |
|                         | Total               | 208                 | 102         | 598   |                     |
| Producer's accuracy (%) | 49.3                | 59.1                | 18.6        |       | 47.5                |

**Table S4.** Count-based confusion matrix for the Level-2 presence of vegetation map.

| Presence of vegetation  | Reference     |           | Total | User's accuracy (%) |
|-------------------------|---------------|-----------|-------|---------------------|
|                         | Non-Vegetated | Vegetated |       |                     |
| Map                     | Non-Vegetated | 146       | 294   | 50.3                |
|                         | Vegetated     | 255       | 304   | 83.9                |
|                         | Total         | 401       | 598   |                     |
| Producer's accuracy (%) | 75.1          | 63.6      |       | 67.4                |

**Table S5.** Count-based confusion matrix for the Level-2 artificiality of cover map.

| Artificiality of cover  |            | Reference   |             | Total      | User's accuracy (%) |
|-------------------------|------------|-------------|-------------|------------|---------------------|
|                         |            | Artificial  | Natural     |            |                     |
| Map                     | Artificial | <b>15</b>   | 41          | 56         | <b>26.8</b>         |
|                         | Natural    | 27          | <b>515</b>  | 542        | <b>95.0</b>         |
|                         | Total      | 42          | 556         | <b>598</b> |                     |
| Producer's accuracy (%) |            | <b>35.7</b> | <b>92.6</b> |            | <b>88.6</b>         |

**Table S6.** Count-based confusion matrix for the Level-3 maps.

| Level-3 |                             | Reference   |                             |             | Total      | User's accuracy (%) |
|---------|-----------------------------|-------------|-----------------------------|-------------|------------|---------------------|
|         |                             | Water body  | Shrubs and herbaceous cover | Trees       |            |                     |
| Map     | Integrated life form        |             |                             |             |            |                     |
|         | Water body                  | <b>108</b>  | 79                          | 21          | 208        | <b>51.9</b>         |
|         | Shrubs and herbaceous cover | 29          | <b>136</b>                  | 51          | 216        | <b>63.0</b>         |
|         | Trees                       | 5           | 43                          | <b>11</b>   | 59         | <b>18.6</b>         |
|         | Total                       | 142         | 258                         | 83          | <b>483</b> |                     |
|         | Producer's accuracy (%)     | <b>76.1</b> | <b>52.7</b>                 | <b>13.3</b> |            | <b>52.8</b>         |
|         | CGLS life form              |             |                             |             |            |                     |
|         | Water body                  | <b>100</b>  | 51                          | 13          | 164        | <b>61.0</b>         |
|         | Shrubs and herbaceous cover | 32          | <b>166</b>                  | 51          | 249        | <b>66.7</b>         |
|         | Trees                       | 10          | 41                          | <b>19</b>   | 70         | <b>27.1</b>         |
|         | Total                       | 142         | 258                         | 83          | <b>483</b> |                     |
|         | Producer's accuracy (%)     | <b>70.4</b> | <b>64.3</b>                 | <b>22.9</b> |            | <b>59.0</b>         |
